# Supplementary material for: Malachite green: a long-buried water-soluble AIEgen with near-infrared fluorescence for living cell nucleus staining
Source: Royal Society of Chemistry journal article supplement (doi:10.1039/d3cc05535c), 2024-01-01
Supplement: d3cc05535c1.pdf [file d3cc05535c1.pdf]

Electronic Supplementary Information for:

## Malachite Green: A long-buried water-soluble AIEgen with near-infrared fluorescence for living cell nucleus staining

Yuan Luo,<sup>‡a</sup> Lihua Zhou,<sup>‡b</sup> Lili Du,<sup>‡c</sup> Yangzi Xie,<sup>a</sup> Xiang-Yang Lou,<sup>d</sup> Lintao Cai,<sup>a</sup> Ben Zhong Tang,<sup>c</sup> Ping Gong\*,<sup>a</sup> Pengfei Zhang\*<sup>a</sup>

- a. *Guangdong Key Laboratory of Nanomedicine, CAS-HK Joint Lab of Biomaterials, CAS Key Laboratory of Biomedical Imaging Science and System, Shenzhen Engineering Laboratory of Nanomedicine and Nanoformulations, CAS Key Lab for Health Informatics, Shenzhen Institutes of Advanced Technology, Chinese Academy of Sciences, Shenzhen 518055, P. R. China.*
- b. *School of Applied Biology, Shenzhen Institute of Technology, No. 1 Jiangjunmao, Shenzhen, P. R. China*
- c. *School of Life Sciences, Jiangsu University, Zhenjiang, 212013, P.R. China*
- d. *GTS-UAB Research Group, Department of Chemistry, Facultat de Ciències, Universitat Autònoma de Barcelona, 08193 Bellaterra, Spain.*
- e. *School of Science and Engineering, Shenzhen Institute of Aggregate Science and Technology, The Chinese University of Hong Kong, Shenzhen (CUHK-Shenzhen), Guangdong 518172, China*

<sup>‡</sup> These authors contributed equally to this work.

*Corresponding Author*

\* *E-mail: [pf.zhang@siat.ac.cn](mailto:pf.zhang@siat.ac.cn); [ping.gong@siat.ac.cn](mailto:ping.gong@siat.ac.cn)*

## **Table of contents**

|                                            |   |
|--------------------------------------------|---|
| 1. Reagents and Instruments .....          | 3 |
| 2. Theoretical Calculations .....          | 3 |
| 3. Cell Culture and Cytotoxicity Test..... | 3 |
| 4. Characterization Data .....             | 4 |
| 5. Supplemental Figures .....              | 5 |

## 1. Reagents and Instruments

Malachite Green (MG) was purchased from Acmecc Co., Ltd. and were used as received. Cell counting kit-8 (CCK-8) were purchased from Beyotime (Shanghai, China). Unless stated otherwise, all commercial reagents used in the experiments were analytical pure and used directly without further purification.

The  $^1\text{H}$  NMR spectra was recorded on a Bruker AVANCE III 400 in MeOD.  $^1\text{H}$  NMR chemical shifts are reported in ppm relative to tetramethylsilane (TMS) with the solvent resonance employed as the internal standard (MeOD at 3.31 ppm). Data are reported as follows: chemical shift, multiplicity (s = singlet, br s = broad singlet, d = doublet, t = triplet, q = quartet, m = multiplet), coupling constants (Hz) and integration. High resolution mass spectra (HRMS) data were recorded on Thermo QExactive Focus. The fluorescence spectra were collected on an Edinburgh FLS 920 spectrophotometer. The absorption spectra were obtained on a Shimadzu UV-2600i spectrophotometer. Confocal laser scanning microscopy (CLSM) images were performed on a Leica (STELLARIS 5) confocal fluorescence microscope. The fluorescence imaging of **MG** power was performed on an IVIS Spectrum System. All the images were analyzed using ImageJ.

## 2. Theoretical Calculations

Density functional theory (DFT) calculations were employed to understand the electronic excitation and photophysical properties of **MG**. Geometry optimizations in the ground were carried out with B3LYP function in combination with the 6-31G(d) basis set. All calculations were carried out with Gaussian 16W.

## 3. Cell Culture and Cytotoxicity Test

The HeLa cells, 4T1 cells, Neuron cells and 293T cells were cultured in

Dulbecco's modified Eagle's medium (DMEM) containing 10% fetal bovine serum (FBS) in a 5% CO<sub>2</sub> atmosphere at 37 °C. Then, cells were incubated with **MG** at different concentrations of (0, 3, 6, 12 and 25 μM) for 12 h. Then removed the old medium and washed the wells three times with PBS buffer. Subsequently, 100 μL fresh medium and 10 μL of CCK-8 was added and incubated for another 1.5 h. Finally, the absorbance was recorded at 450 nm using a Tecan Infinite M Plex microplate reader.

#### 4. Characterization Data

<sup>1</sup>H NMR (400 MHz, MeOD) δ (ppm) 7.79 - 7.70 (m, 1H), 7.61 (t, J = 7.8 Hz, 2H), 7.49 - 7.35 (m, 6H), 7.11 - 7.02 (m, 4H), 3.34 (s, 12H).

HRMS (ESI) calcd. for C<sub>23</sub>H<sub>25</sub>N<sub>2</sub> [M]<sup>+</sup> 329.20123, found: 329.20102.

## 5. Supplemental Figures

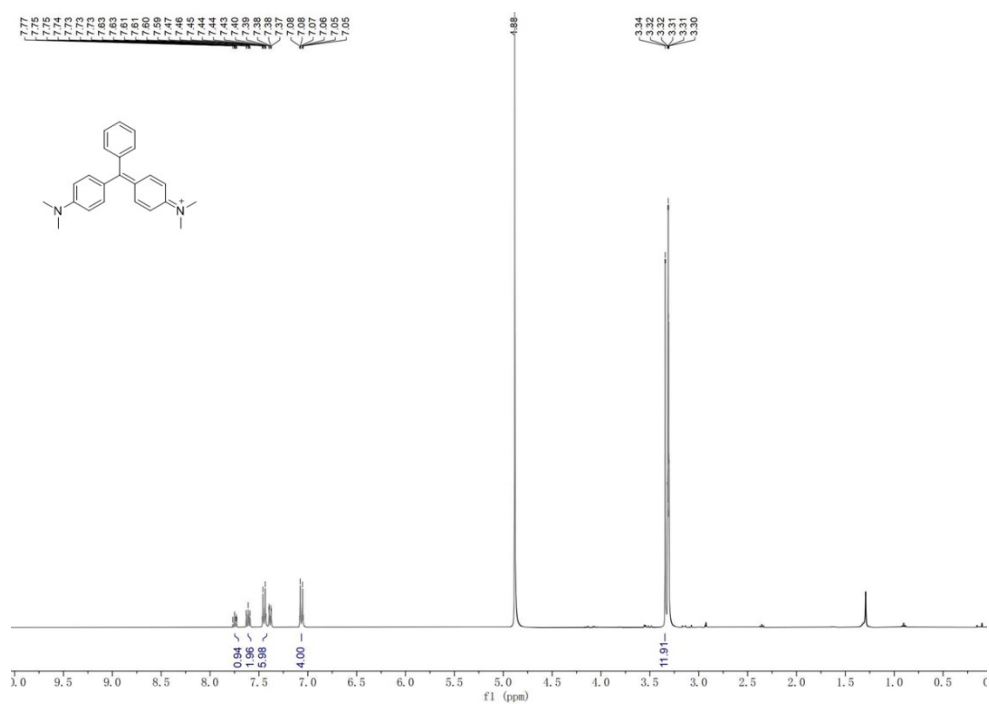

**Figure S1.**  $^1\text{H}$  NMR spectrum (400 MHz) of Malachite Green (MG) in MeOD.

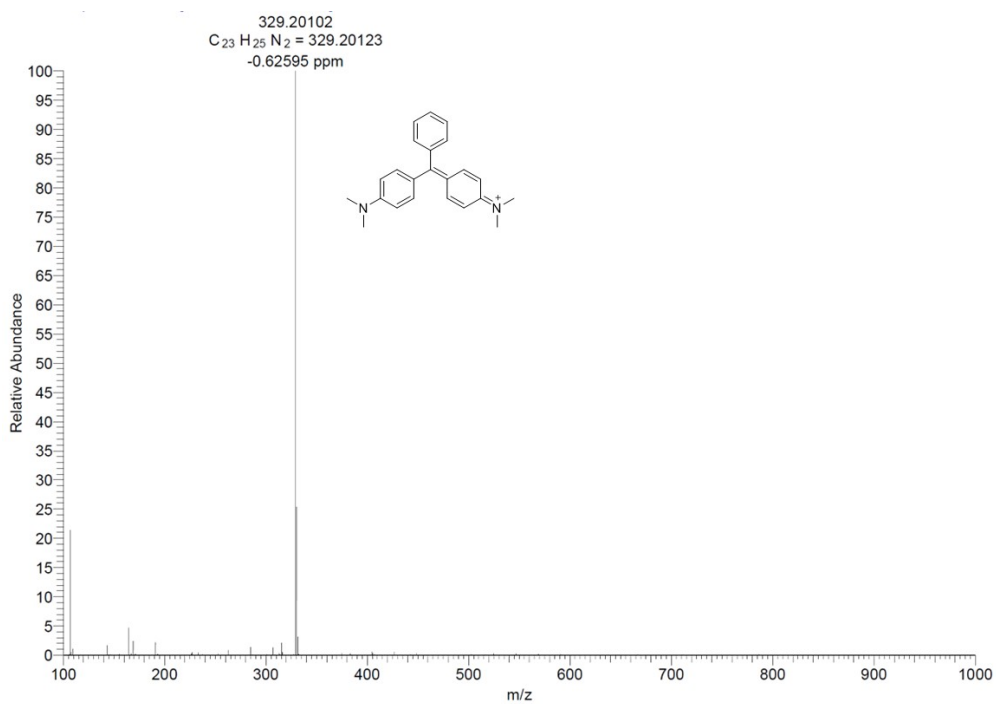

**Figure S2.** HRMS (ESI) of Malachite Green (MG).

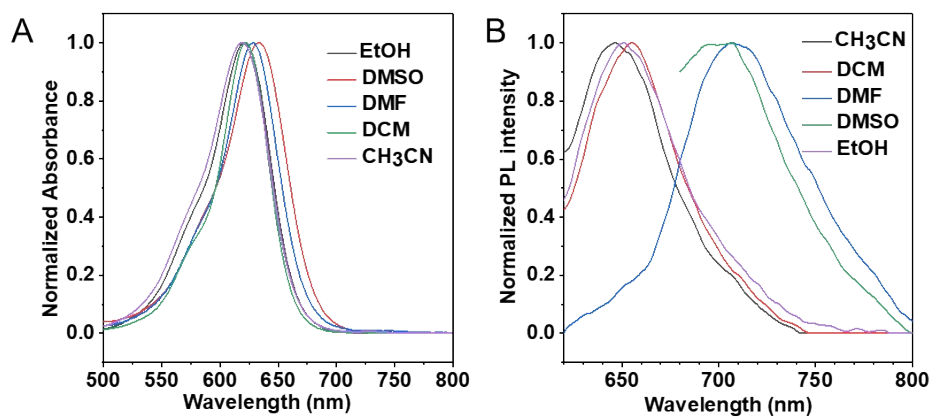

**Figure S3.** Normalized absorption (A) and PL spectra (B) of **MG** in different solvents (DMSO: dimethyl sulfoxide, DMF: dimethylformamide, DCM: dichloromethane).

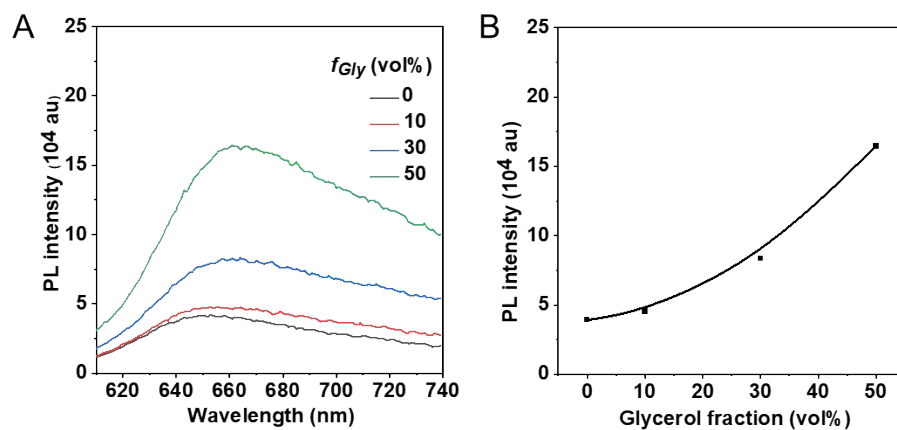

**Fig. S4** (A) PL spectra of **MG** in water/glycerol mixtures with different glycerol fractions ( $f_{Gly}$ ). (B) Plotting of the emission maximum of **MG** versus the fraction of the H<sub>2</sub>O/Glycerol mixtures.



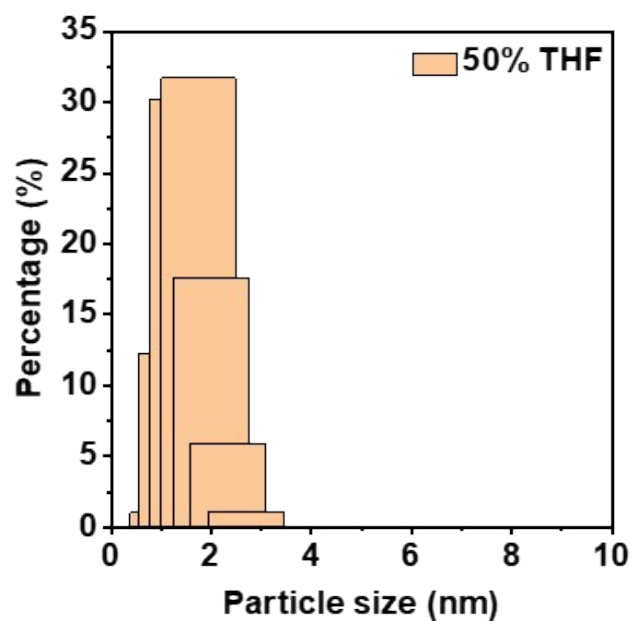

**Fig. S5** The DLS measurement result of Malachite Green in the mixture of H<sub>2</sub>O/THF with THF fraction of 50 vol%.

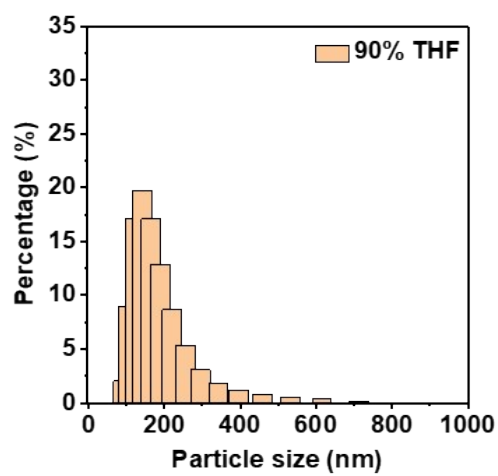

**Fig S6.** The DLS measurement result of Malachite Green in the mixture of H<sub>2</sub>O/THF with THF fraction of 90 vol%.

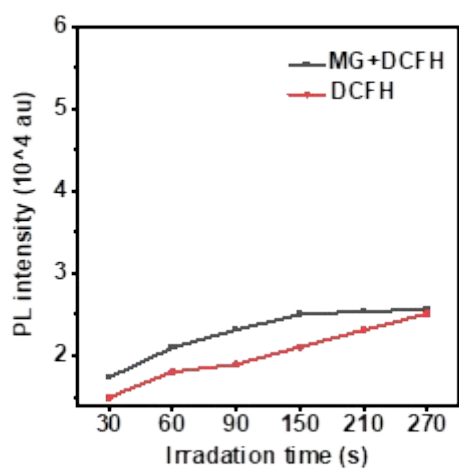

**Fig. S7** ROS generation of **MG** upon white light irradiation. Relative changes in PL intensity of DCFH (for overall ROS detection)

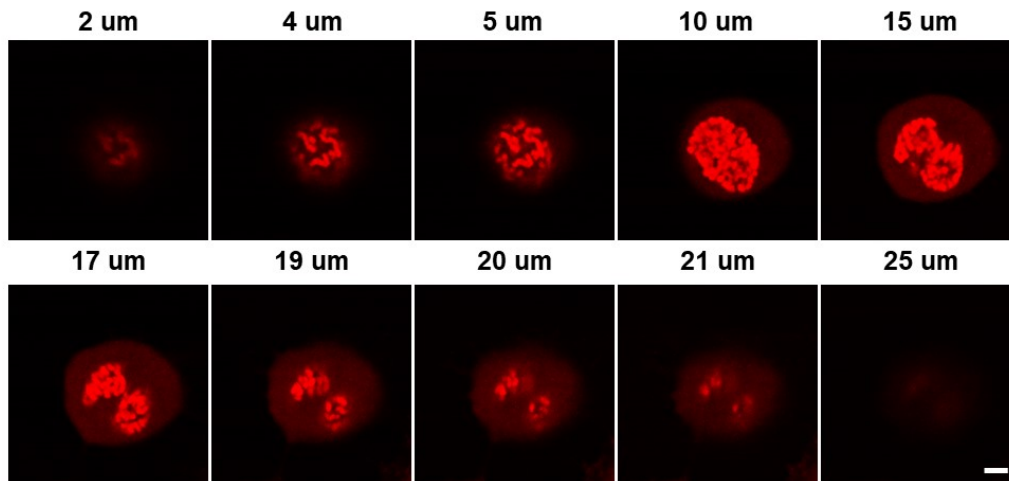

**Fig. S8** Z-axis scanning of **MG**-stained HeLa cell nuclei revealed through confocal microscopy. HeLa cells were cultured on glass bottom dishes for 24 h before observation, and then the culture medium was replaced with SFM mixed with **MG** and cocultured for 5 min. Micrographs were taken while moving the focal plane in incremental steps from the dish bottom up to the top of the cell. The fluorescence images are shown here. Scale bar = 5  $\mu\text{m}$ .

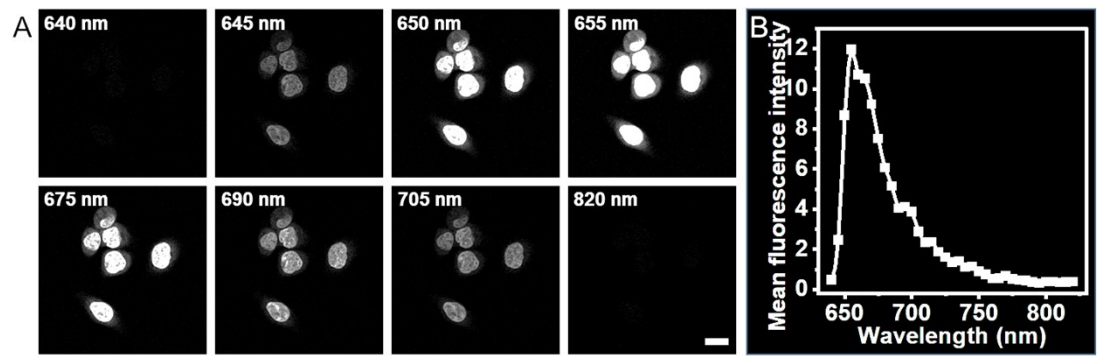

**Fig. S9** Spectral imaging. (A) Spectral images of HeLa cells stained by MG. Scale bar = 10  $\mu$ m. (B) Spectra of the HeLa cells.

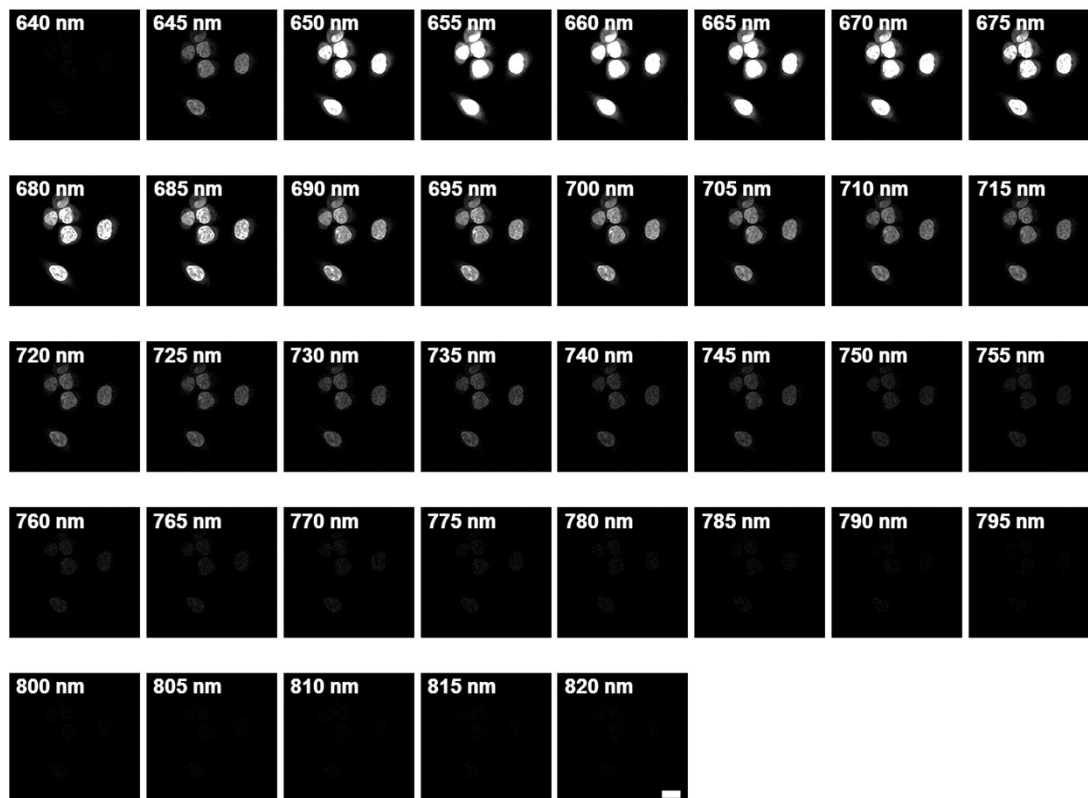

**Fig. S10** Spectral images of HeLa cells. Scale bar = 10  $\mu$ m.

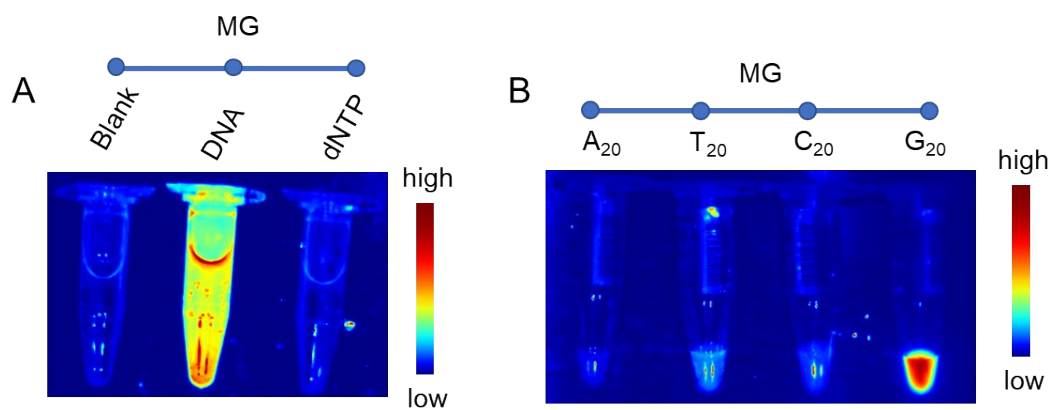

**Fig. S11** (A) Fluorescence photo of the mixture of Malachite Green incubated with DNA or dNTP under 640nm light excitation. (B) Fluorescence photo of the mixture of Malachite Green incubated with DNA with our 20-mer DNA homopolymers ( $A_{20}$ =poly A,  $T_{20}$ =poly T,  $C_{20}$ =poly C,  $G_{20}$ =poly G) under 640nm light excitation.

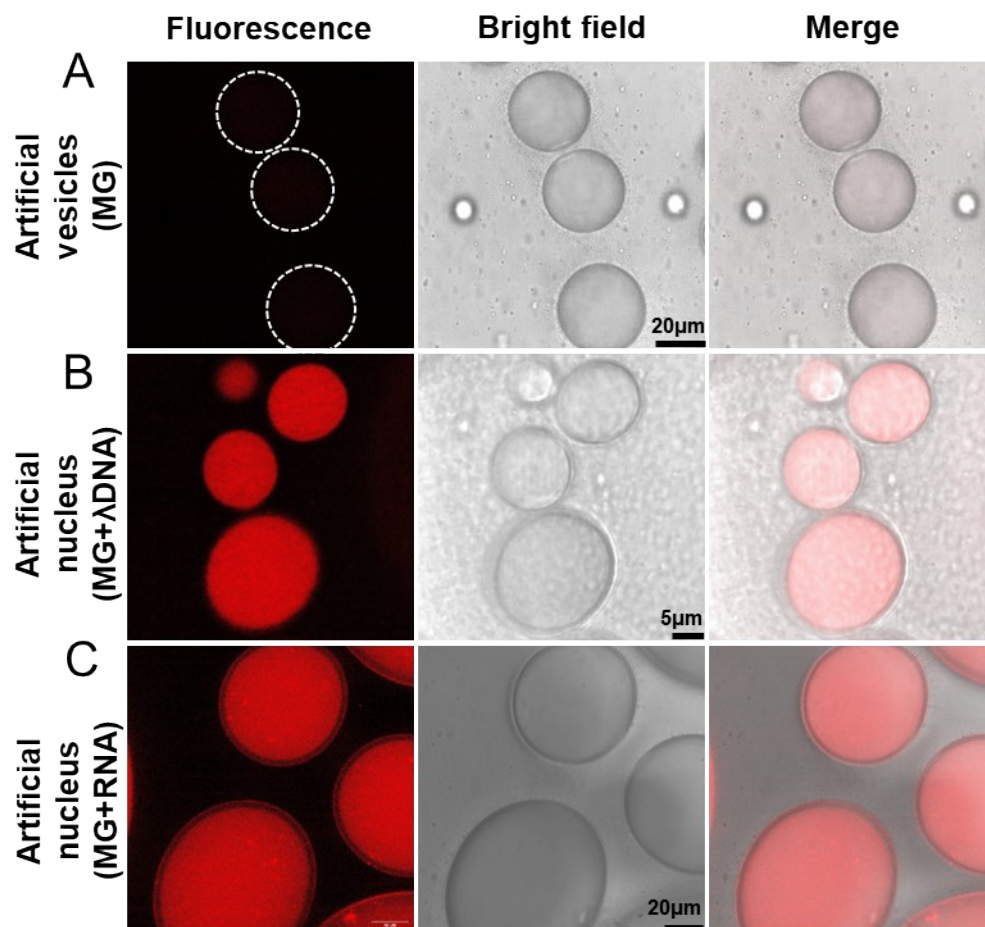

**Fig. S12** Confocal images of droplets generated by microfluidic devices: (A) Artificial vesicles (MG), Scale bar = 20 µm. (B) Artificial nucleus (MG+λDNA), Scale bar = 5 µm. (C) Artificial nucleus (MG+RNA), Scale bar = 20 µm.

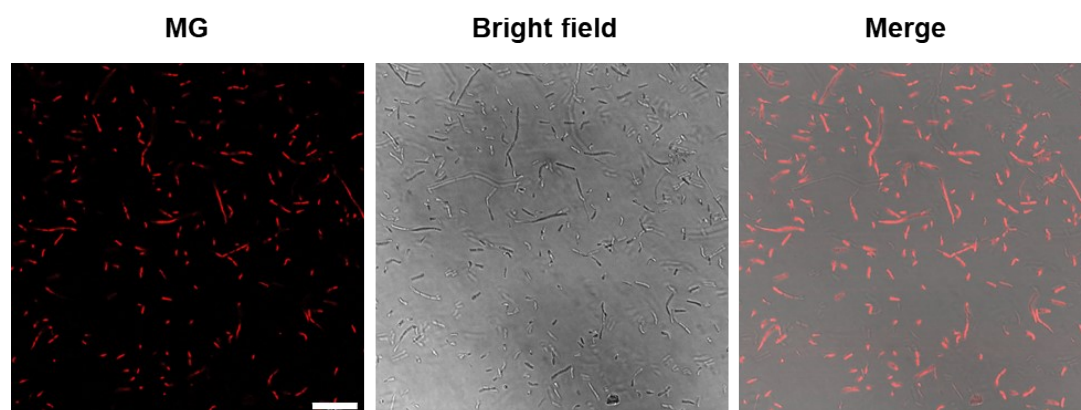

**Fig. S13** Colocalization images of marine *Bacillus* sp. BS11 stained with MG. MG ( $\lambda_{ex}$  = 638 nm,  $\lambda_{em}$  = 650-850 nm). Scale bar = 20 µm.

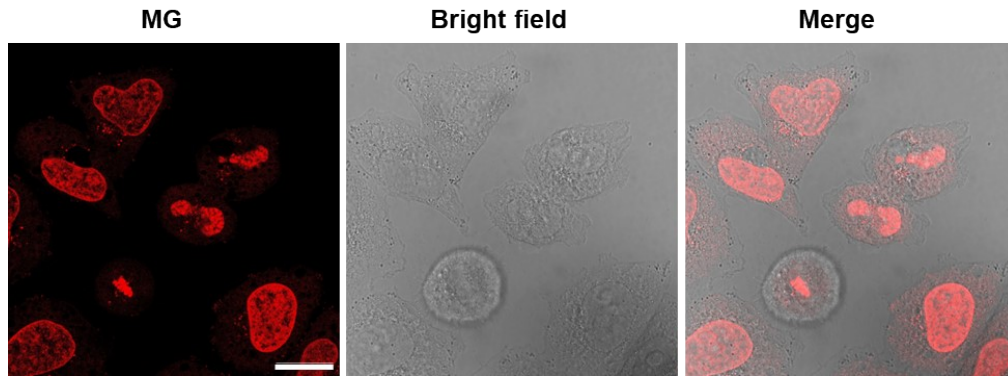

**Fig. S14** Colocalization images of fixed HeLa cells with **MG**. **MG** ( $\lambda_{\text{ex}} = 638 \text{ nm}$ ,  $\lambda_{\text{em}} = 650\text{-}850 \text{ nm}$ ). Scale bar = 20  $\mu\text{m}$ .



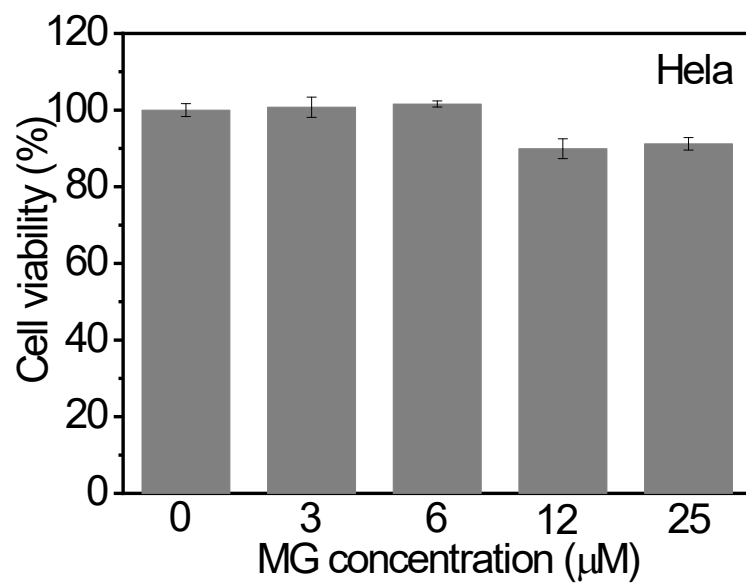

**Fig. S15** The cell viability of HeLa after incubating with different concentrations of MG after 0.5 h by CCK-8 assay.

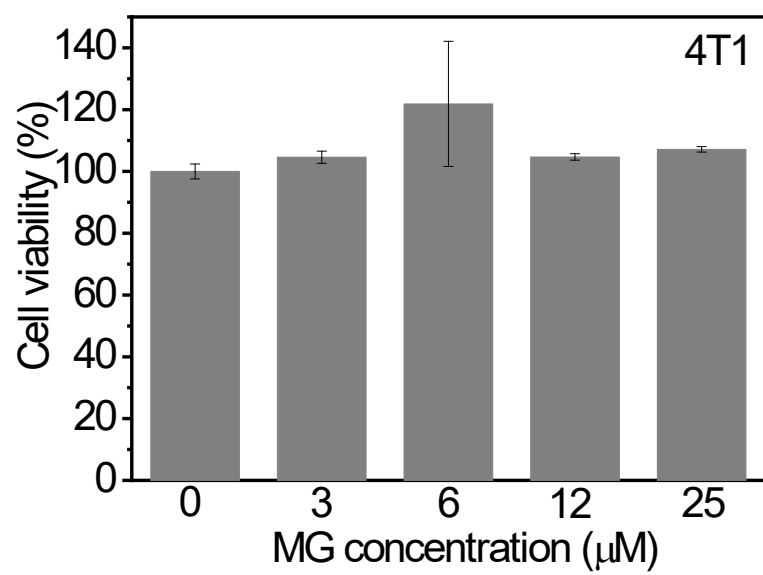

**Fig. S16** The cell viability of 4T1 after incubating with different concentrations of MG after 0.5 h by CCK-8 assay.

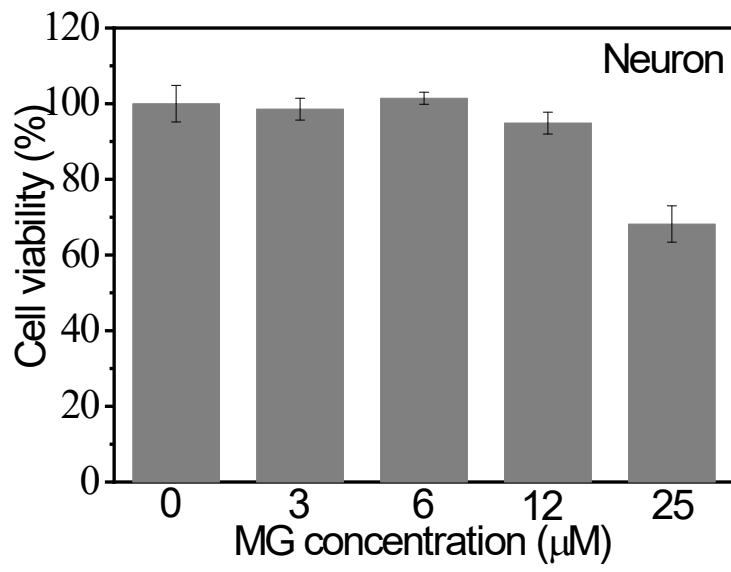

**Fig. S17** The cell viability of neuron after incubating with different concentrations of **MG** after 0.5 h by CCK-8 assay.

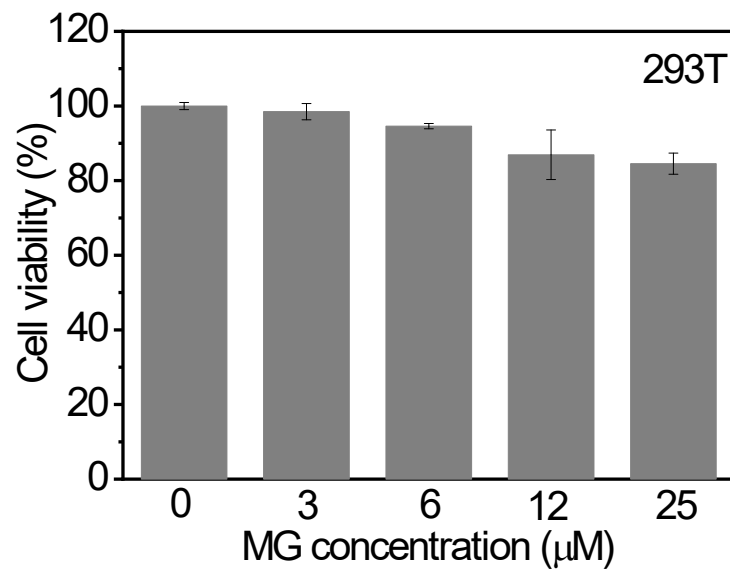

**Fig. S18** The cell viability of 293T after incubating with different concentrations of MG after 0.5 h by CCK-8 assay.

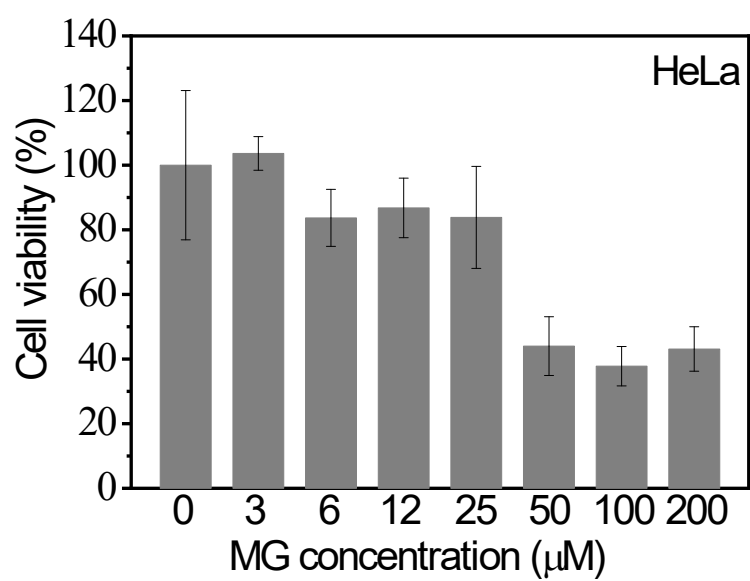

**Fig. S19** The cell viability of HeLa after incubating with different concentrations of MG after 24 h by CCK-8 assay.

Table S1. The comparison of exist nucleus staining fluorescent probe.

| References                                           | Name of the Probes                             | Em.(nm)                    | Live cells | Fixed cells |
|------------------------------------------------------|------------------------------------------------|----------------------------|------------|-------------|
| <i>Anal.Chem.</i> 2017, 89, 78                       | PDA                                            | 465                        | yes        | no          |
| <i>Sci Rep</i> , 2016, 6, 34807                      | 1                                              | 351/448                    | yes        | no          |
| <i>Biomaterials</i> , 2014, 35, 2103                 | PY and IN                                      | 530                        | yes        | no          |
| <i>ACS Sens</i> , 2021, 6, 1552                      | HMBI                                           | 550/605                    | yes        | yes         |
| <i>Photochem Photobiol Sci</i> , 2020, 19, 1152      | 1                                              | 604                        | yes        | no          |
| <i>Sensors and Actuators B: Chemical</i> , 2021, 347 | LN-2                                           | 525                        | no         | yes         |
| <i>Biosens Bioelectron</i> , 2015, 68, 189           | CP                                             | 658                        | yes        | no          |
| <i>Anal Chim Acta</i> , 2020, 1096, 148              | RatioTr                                        | 545                        | yes        | no          |
| <i>Chem Commun</i> , 2015, 51, 9336                  | CDb12                                          | 490                        | yes        | no          |
| <i>ACS Chem Biol</i> , 2015, 10, 1171                | MPI                                            | 536                        | yes        | no          |
| <i>Sci Rep</i> , 2016, 6, 26477                      | CZtpyZn                                        | 570                        | yes        | no          |
| This work                                            | MG                                             | 696                        | yes        | yes         |
| Commercial reagents                                  | Name of the Probes                             | Em.(nm)                    | Live cells | Fixed cells |
| Thermo Fisher Scientific Inc.                        | Hoechst 33342                                  | 461                        | yes        | no          |
| Thermo Fisher Scientific Inc.                        | SYTO™ 9 Green Fluorescent Nucleic Acid Stain   | RNA: 501 nm<br>DNA: 498 nm | yes        | no          |
| Thermo Fisher Scientific Inc.                        | SYTO™ 82 Orange Fluorescent Nucleic Acid Stain | 560                        | yes        | no          |
| Thermo Fisher Scientific Inc.                        | SYTO™ 59 Red Fluorescent Nucleic Acid Stain    | 645                        | yes        | yes         |
| Thermo Fisher Scientific Inc.                        | SYTO™ Deep Red Nucleic Acid Stain              | 669                        | yes        | no          |
| Thermo Fisher Scientific Inc.                        | DAPI                                           | 460                        | no         | yes         |
| Thermo Fisher Scientific Inc.                        | SYTOX™ Blue Nucleic Acid Stain                 | 480                        | no         | yes         |
| Thermo Fisher Scientific Inc.                        | SYTOX™ Green Nucleic Acid Stain                | 523                        | no         | yes         |
| Thermo Fisher Scientific Inc.                        | SYTOX™ Orange Nucleic Acid Stain               | 570                        | no         | yes         |
| Thermo Fisher Scientific Inc.                        | SYTOX™ Deep Red Nucleic Acid Stain             | 682                        | no         | yes         |
| Thermo Fisher Scientific Inc.                        | <u>TO-PRO</u>                                  | 661                        | no         | yes         |
